# Supplementary material for: Single-cell RNA-seq landscape midbrain cell responses to red spotted grouper nervous necrosis virus infection
Source: PLoS Pathog. 2021 Jun 29;17(6):e1009665. doi: 10.1371/journal.ppat.1009665 (PMC8241073; doi:10.1371/journal.ppat.1009665)
Supplement: S6 Table — (XLS) [file ppat.1009665.s012.xls]

Cluster	C	NNV
Total	223 (100%)	285 (100%)
Macrophage	112 (50.22%)	180 (63.16%)
Microglia	52 (23.32%)	79 (27.72%)
undefined	32 (14.35%)	13 (4.56%)
T cell	27 (12.11%)	13 (4.56%)
